# Supplementary material
Source: ML conference proceedings conference paper supplement (https://proceedings.mlr.press/v164/zakharov22a.html)
Supplement: Supplementary file 3 [file zakharov22a-supp.zip]

Archive with 2 entries (2 files):
- SSSR_supp.pdf
- __MACOSX/._SSSR_supp.pdf
